# Supplementary material
Source: publisher site journal article supplement (https://www.dovepress.com/article/385502)

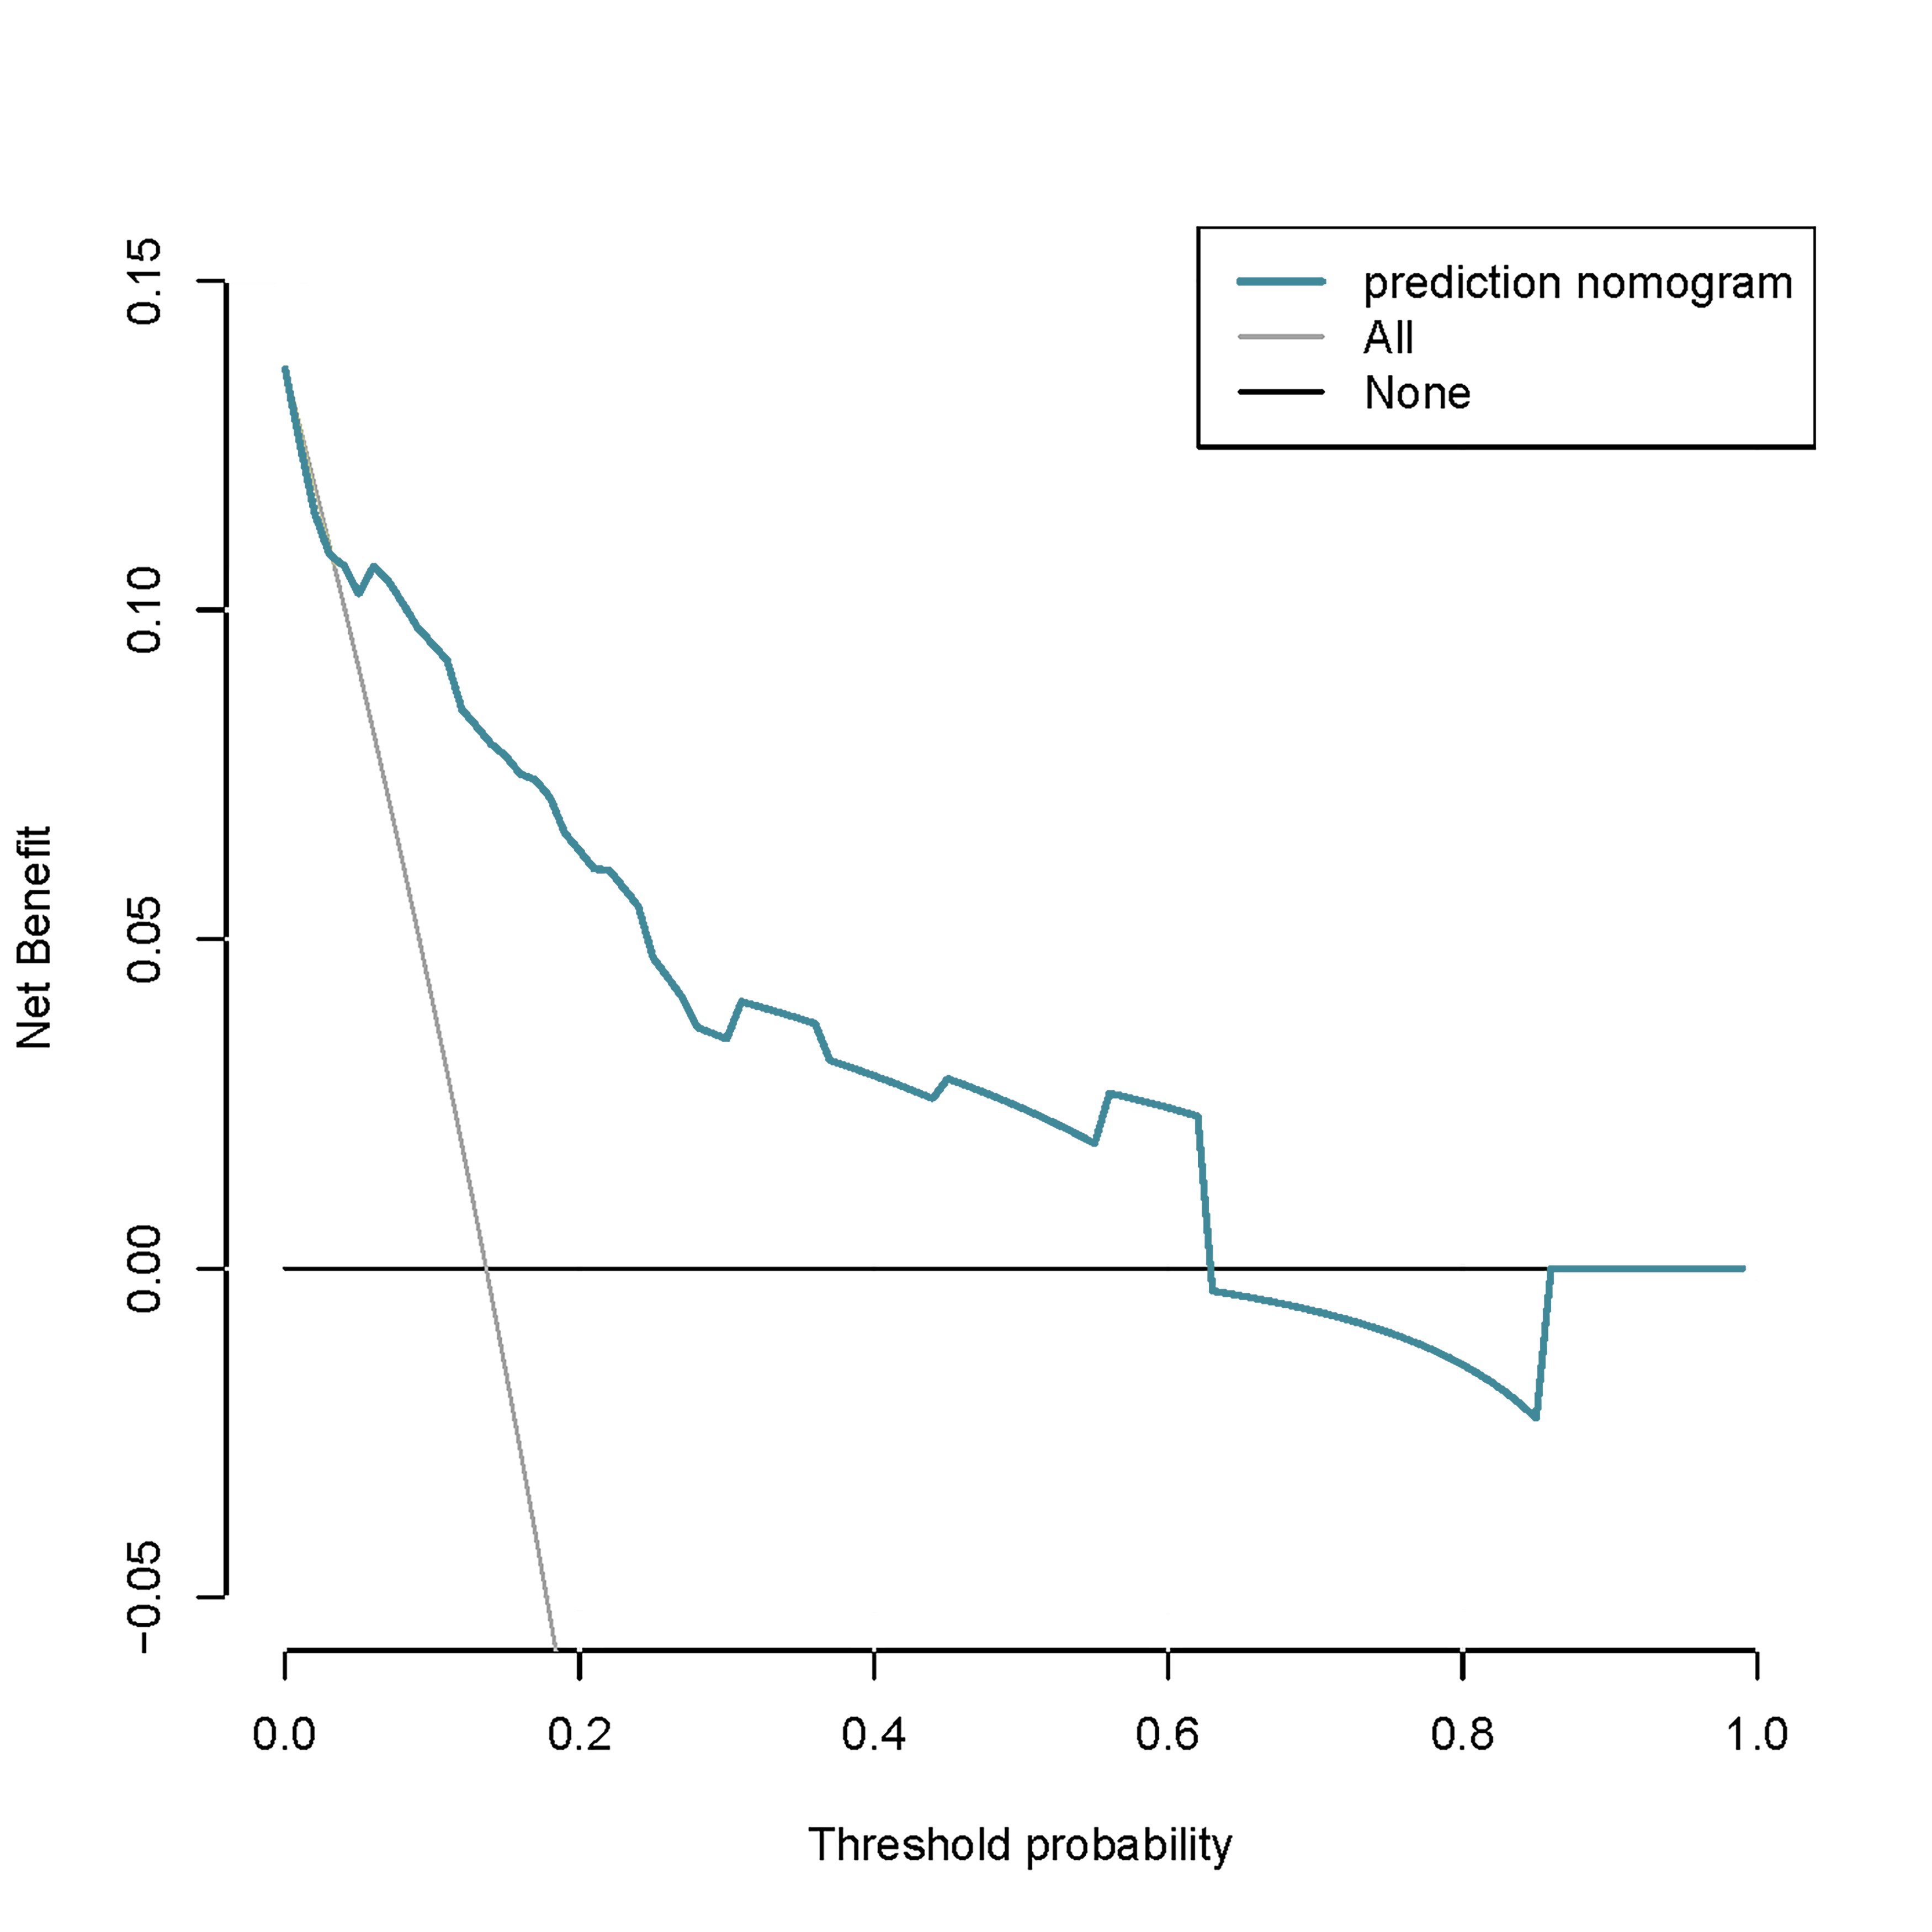


Fig S1: Decision curve analysis for the nomogram Fig S2 Calibration curve of the nomogram analysis


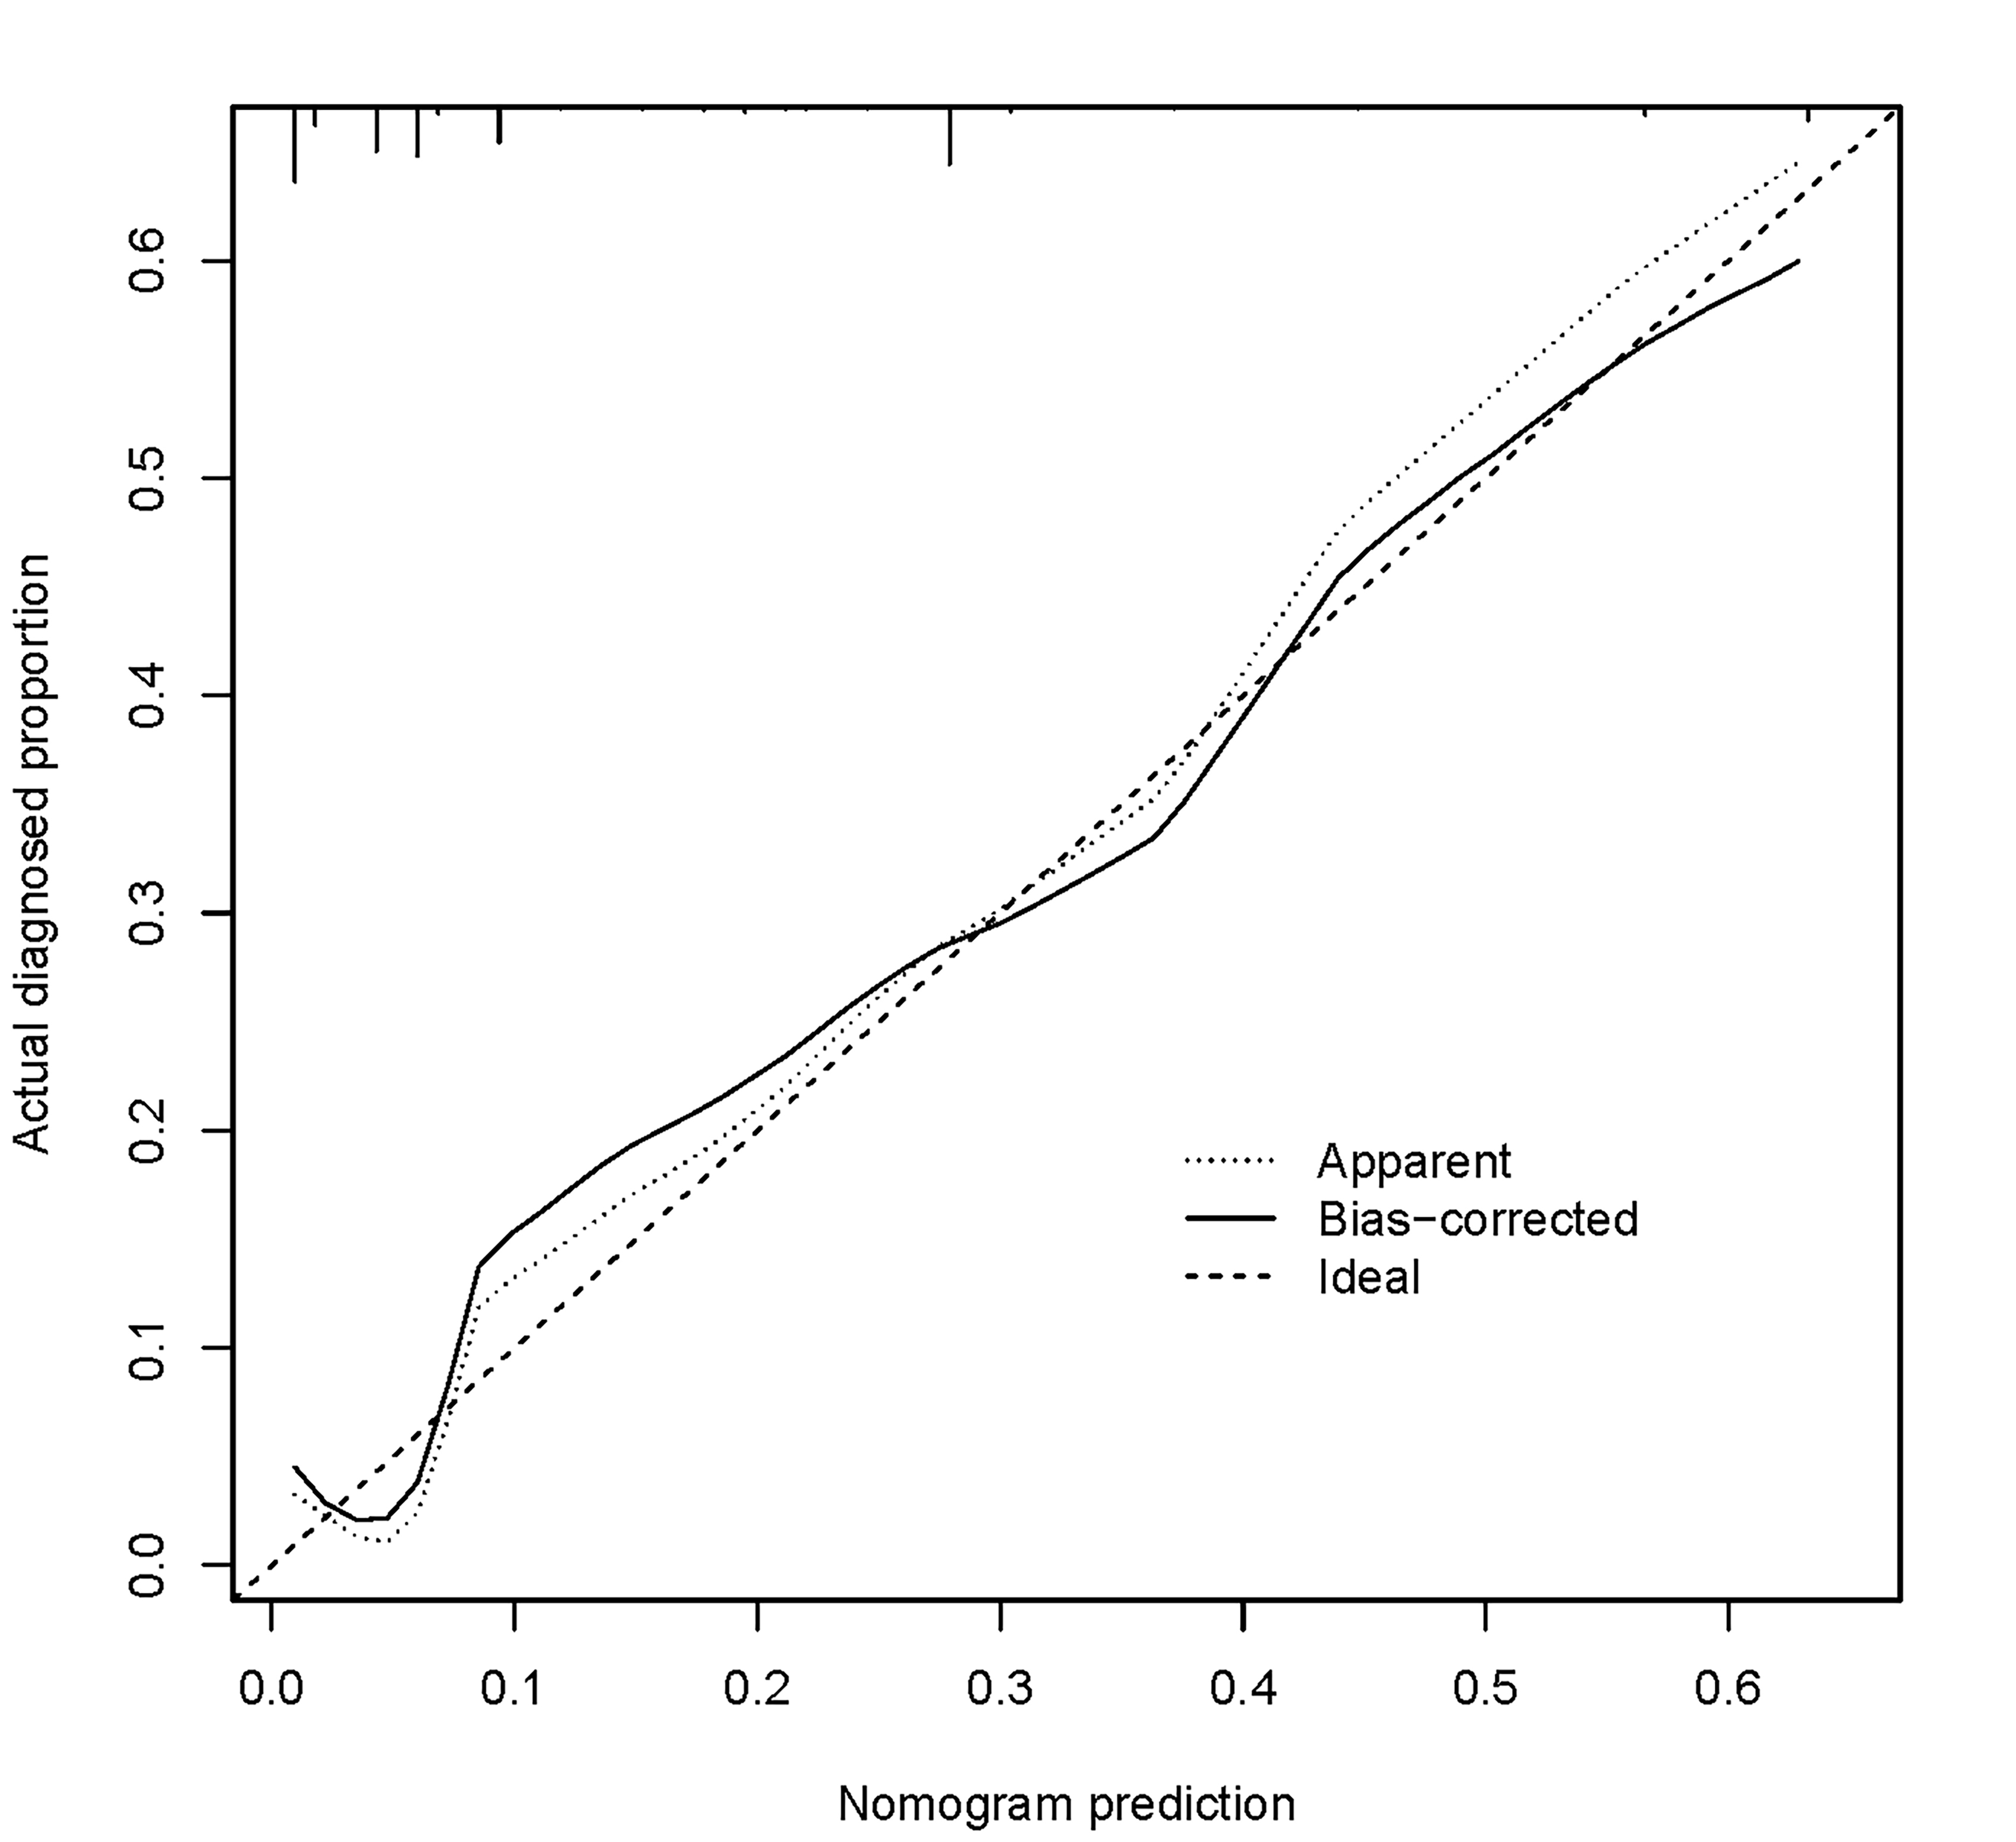

Supplement: Supplementary file 1 [file get_supplementary_file.php]
